# Supplementary material for: In Vitro Inhibition of Influenza Virus Using CRISPR/Cas13a in Chicken Cells
Source: MDPI journal article supplement (doi:10.3390/mps4020040), 2021-06-08
Supplement: s1 [file s1]

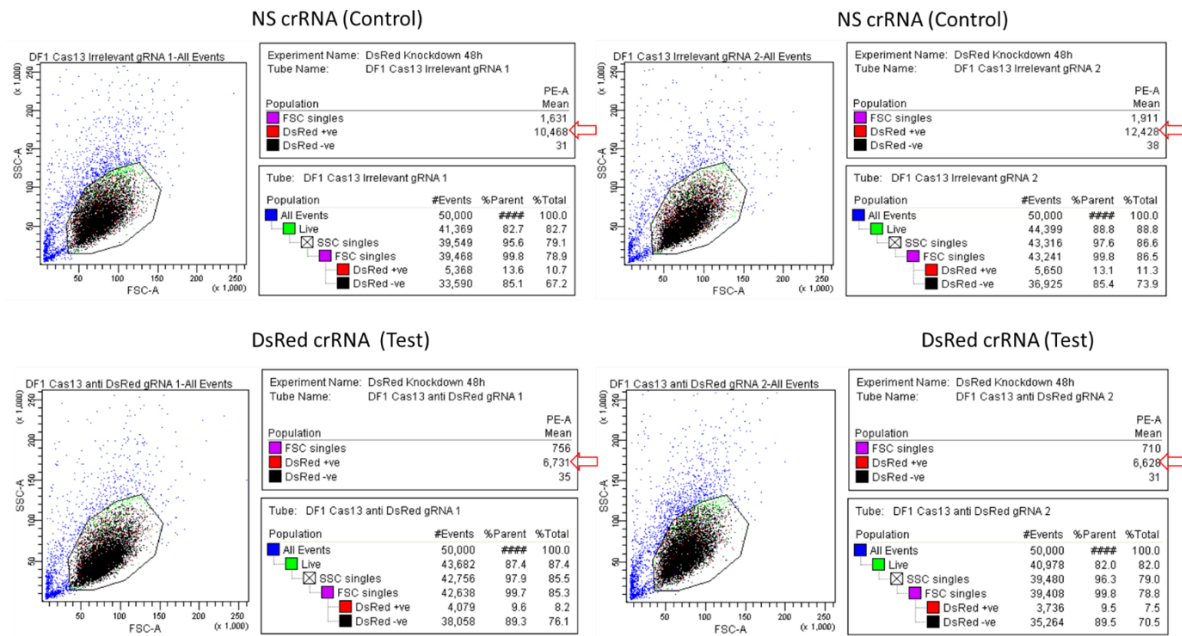

**Figure 1.** FACS plots of DsRed knockdown experiment in DF1-Cas13a cells transfected with either crRNA-DsRed or crRNA-NS. Note: The gRNA means crRNA.

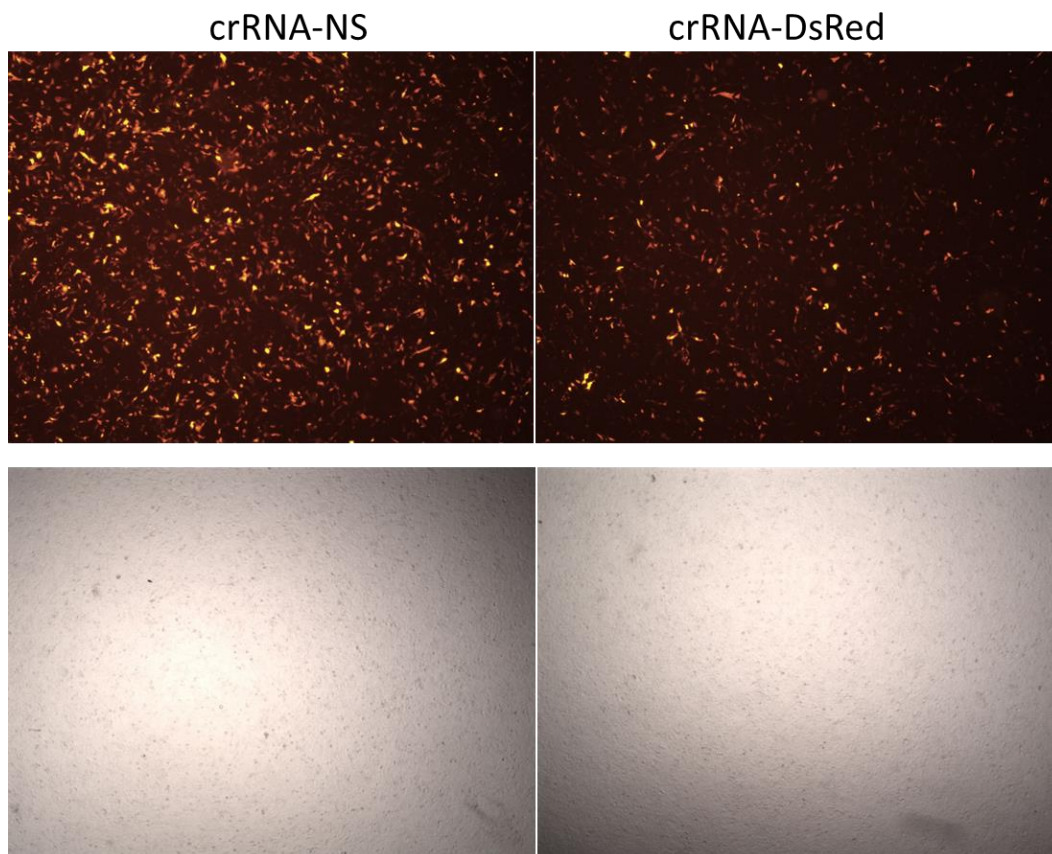

**Figure 2.** Fluorescence and bright field images of DsRed knockdown cells.
